# Supplementary material
Source: publisher figshare collection journal article supplement (https://acs.figshare.com/ndownloader/files/11854205)
Supplement: Supplementary file 1 [file 11854205]

## Supplemental Figures

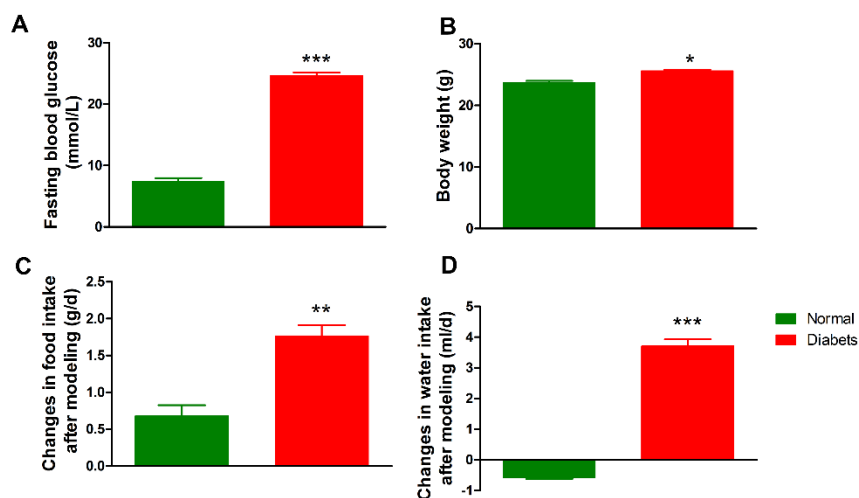

**Supplementary Figure 1.** Mice treated with STZ intraperitoneal injection after 4 weeks high fat diet for diabetic model building. (A) Level of fasting blood glucose. (B) Body weight. (C) Changes in food intake. (D) Changes in water intake. Data are shown as mean  $\pm$  SEM. Differences between groups were statistically analyzed by t test, \*\*  $p < 0.01$ , \*\*\*  $p < 0.001$  compared with normal group.

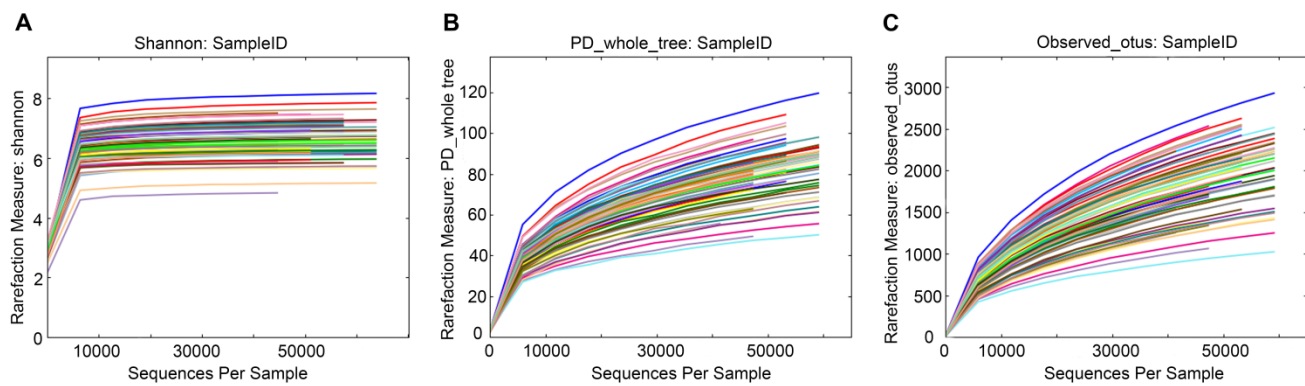

**Supplementary Figure 2.** Alpha diversity of gut microbial 16S rRNA genes. (A) Shannon index of all samples. (B) PD whole tree index of all samples. (C) Observed OTUs of all samples.

## Supplemental Tables

**Supplemental Table 1.** Effect of treatments of MF, MOS and MF+MOS on water intake in C57BL/6J

mice (mean  $\pm$  SEM)

| Group    | 0 week<br>(mL/mice) | 1 week<br>(mL/mice)         | 2 weeks<br>(mL/mice)            | 3 weeks<br>(mL/mice)         | 4 weeks<br>(mL/mice)       | 5 weeks<br>(mL/mice)        |
|----------|---------------------|-----------------------------|---------------------------------|------------------------------|----------------------------|-----------------------------|
| NC       | 3.1 $\pm$ 0.0       | 2.8 $\pm$ 0.00              | 3.3 $\pm$ 0.2                   | 2.6 $\pm$ 0.2                | 2.8 $\pm$ 0.1              | 2.7 $\pm$ 0.0               |
| MC       | 6.4 $\pm$ 0.9**     | 6.48 $\pm$ 0.3**            | 7.6 $\pm$ 0.6**                 | 7.1 $\pm$ 0.0***             | 6.6 $\pm$ 0.4*             | 5.2 $\pm$ 0.0**             |
| MFH      | 6.6 $\pm$ 0.0       | 7.2 $\pm$ 0.2               | 7.4 $\pm$ 0.4                   | 6.0 $\pm$ 0.5                | 5.4 $\pm$ 0.6              | 3.2 $\pm$ 0.26 <sup>#</sup> |
| MFL      | 7.5 $\pm$ 1.8       | 7.9 $\pm$ 0.3               | 8.2 $\pm$ 0.2                   | 7.3 $\pm$ 0.5                | 6.0 $\pm$ 0.8              | 4.0 $\pm$ 0.2               |
| MOSH     | 6.5 $\pm$ 1.1       | 5.5 $\pm$ 0.2               | 4.8 $\pm$ 0.0 <sup>#</sup>      | 6.7 $\pm$ 1.0                | 5.0 $\pm$ 0.3              | 3.6 $\pm$ 0.7               |
| MOSM     | 6.3 $\pm$ 0.4       | 5.7 $\pm$ 0.7               | 5.5 $\pm$ 0.1                   | 6.0 $\pm$ 0.8                | 5.2 $\pm$ 0.3              | 4.7 $\pm$ 0.0               |
| MOSL     | 7.0 $\pm$ 0.3       | 8.0 $\pm$ 0.2               | 6.4 $\pm$ 0.0                   | 8.1 $\pm$ 0.0                | 6.1 $\pm$ 0.1              | 5.6 $\pm$ 0.4               |
| MFH+MOSH | 6.7 $\pm$ 0.6       | 3.8 $\pm$ 0.1 <sup>##</sup> | 3.3 $\pm$ 0.4 <sup>####++</sup> | 3.4 $\pm$ 0.1 <sup>##+</sup> | 3.9 $\pm$ 0.5 <sup>#</sup> | 2.4 $\pm$ 0.3 <sup>##</sup> |
| MFH+MOSM | 7.2 $\pm$ 1.9       | 6.7 $\pm$ 0.3               | 6.6 $\pm$ 0.0                   | 5.8 $\pm$ 0.3                | 5.3 $\pm$ 0.4              | 4.5 $\pm$ 0.3               |
| MFL+MOSH | 6.2 $\pm$ 0.6       | 5.5 $\pm$ 0.8               | 4.0 $\pm$ 1.1 <sup>####++</sup> | 4.7 $\pm$ 0.2 <sup>##+</sup> | 4.3 $\pm$ 0.3              | 2.4 $\pm$ 0.8 <sup>##</sup> |
| MFL+MOSM | 6.7 $\pm$ 1.2       | 6.9 $\pm$ 0.2               | 6.4 $\pm$ 0.3                   | 5.7 $\pm$ 0.5                | 4.5 $\pm$ 1.3              | 3.9 $\pm$ 0.2               |

Data were analyzed using one-way ANOVA followed by Tukey's post hoc test. \*  $p < 0.05$ , \*\*  $p < 0.01$ , \*\*\*  $p < 0.001$  compared with normal control group (NC); <sup>#</sup> $p < 0.05$ , <sup>##</sup> $p < 0.01$ , <sup>###</sup> $p < 0.001$  compared with diabetic model group (MC); <sup>+</sup> $p < 0.05$ , <sup>++</sup> $p < 0.01$ , <sup>+++</sup> $p < 0.001$  MF+MOS group compared with MF group with the same dosage.

**Supplemental Table 2.** Effect of treatments of MF, MOS and MF+MOS on food intake in C57BL/6J mice (mean  $\pm$  SEM)

| Group    | 0 week<br>(g) | 1 week<br>(g) | 2 weeks<br>(g) | 3 weeks<br>(g) | 4 weeks<br>(g) | 5 weeks<br>(g) |
|----------|---------------|---------------|----------------|----------------|----------------|----------------|
| NC       | 2.6 $\pm$ 0.2 | 2.7 $\pm$ 0.0 | 2.6 $\pm$ 0.0  | 2.5 $\pm$ 0.0  | 2.4 $\pm$ 0.4  | 2.3 $\pm$ 0.0  |
| MC       | 2.4 $\pm$ 0.1 | 2.2 $\pm$ 0.1 | 2.5 $\pm$ 0.0  | 2.6 $\pm$ 0.2  | 2.6 $\pm$ 0.2  | 2.0 $\pm$ 0.1  |
| MFH      | 2.5 $\pm$ 0.1 | 2.8 $\pm$ 0.1 | 2.5 $\pm$ 0.1  | 2.4 $\pm$ 0.0  | 2.4 $\pm$ 0.1  | 2.1 $\pm$ 0.4  |
| MFL      | 2.8 $\pm$ 0.2 | 2.8 $\pm$ 0.3 | 2.8 $\pm$ 0.0  | 2.8 $\pm$ 0.1  | 2.3 $\pm$ 0.3  | 2.0 $\pm$ 0.3  |
| MOSH     | 2.5 $\pm$ 0.1 | 2.0 $\pm$ 0.1 | 2.3 $\pm$ 0.2  | 2.9 $\pm$ 0.1  | 2.7 $\pm$ 0.1  | 2.2 $\pm$ 0.2  |
| MOSM     | 2.5 $\pm$ 0.1 | 2.4 $\pm$ 0.0 | 2.5 $\pm$ 0.2  | 2.6 $\pm$ 0.1  | 2.5 $\pm$ 0.1  | 2.1 $\pm$ 0.1  |
| MOSL     | 2.5 $\pm$ 0.0 | 2.6 $\pm$ 0.0 | 2.3 $\pm$ 0.0  | 2.9 $\pm$ 0.0  | 2.4 $\pm$ 0.0  | 2.1 $\pm$ 0.1  |
| MFH+MOSH | 2.4 $\pm$ 0.0 | 2.2 $\pm$ 0.0 | 2.4 $\pm$ 0.0  | 2.2 $\pm$ 0.0  | 2.5 $\pm$ 0.2  | 2.0 $\pm$ 0.0  |
| MFH+MOSM | 2.4 $\pm$ 0.1 | 2.5 $\pm$ 0.1 | 2.6 $\pm$ 0.0  | 2.6 $\pm$ 0.2  | 2.6 $\pm$ 0.2  | 2.1 $\pm$ 0.0  |
| MFL+MOSH | 2.4 $\pm$ 0.2 | 2.4 $\pm$ 0.1 | 2.2 $\pm$ 0.0  | 2.3 $\pm$ 0.0  | 2.4 $\pm$ 0.0  | 1.8 $\pm$ 0.2  |
| MFL+MOSM | 2.2 $\pm$ 0.0 | 2.6 $\pm$ 0.1 | 2.4 $\pm$ 0.2  | 2.4 $\pm$ 0.2  | 2.1 $\pm$ 0.3  | 1.8 $\pm$ 0.2  |

Data were analyzed using one-way ANOVA followed by Tukey's post hoc test.

**Supplemental Table 3.** Effect of treatments of MF, MOS and MF+MOS on body weight in C57BL/6Jmice (mean  $\pm$  SEM)

| Group    | 0 week<br>(g)                 | 1 week<br>(g)                 | 2 weeks<br>(g)                 | 3 weeks<br>(g)                | 4 weeks<br>(g)                | 5 weeks<br>(g)                |
|----------|-------------------------------|-------------------------------|--------------------------------|-------------------------------|-------------------------------|-------------------------------|
| NC       | 23.7 $\pm$ 0.8                | 23.9 $\pm$ 0.8                | 24.2 $\pm$ 0.7                 | 24.0 $\pm$ 0.2                | 23.8 $\pm$ 0.2                | 24.8 $\pm$ 0.3                |
| MC       | 25.9 $\pm$ 1.8 <sup>*</sup>   | 26.0 $\pm$ 1.6 <sup>*</sup>   | 26.7 $\pm$ 1.6 <sup>*</sup>    | 26.3 $\pm$ 0.6 <sup>*</sup>   | 26.7 $\pm$ 0.6 <sup>**</sup>  | 27.2 $\pm$ 0.8 <sup>*</sup>   |
| MFH      | 24.9 $\pm$ 1.2                | 24.5 $\pm$ 0.9                | 24.9 $\pm$ 0.9                 | 24.8 $\pm$ 0.4                | 25.2 $\pm$ 0.5                | 25.1 $\pm$ 0.4                |
| MFL      | 27.9 $\pm$ 1.5                | 27.7 $\pm$ 1.8                | 28.4 $\pm$ 1.6                 | 28.5 $\pm$ 0.7                | 28.5 $\pm$ 0.6                | 28.8 $\pm$ 0.6                |
| MOSH     | 25.2 $\pm$ 1.8                | 25.0 $\pm$ 1.5                | 25.5 $\pm$ 1.7                 | 25.4 $\pm$ 0.8                | 26.3 $\pm$ 0.8                | 26.9 $\pm$ 1.1                |
| MOSM     | 25.5 $\pm$ 1.2                | 25.6 $\pm$ 1.1                | 25.6 $\pm$ 0.9                 | 25.8 $\pm$ 0.4                | 26.1 $\pm$ 0.4                | 26.8 $\pm$ 0.4                |
| MOSL     | 25.6 $\pm$ 1.4                | 26.0 $\pm$ 1.2                | 26.4 $\pm$ 1.3                 | 26.2 $\pm$ 0.5                | 26.3 $\pm$ 0.5                | 27.0 $\pm$ 0.5                |
| MFH+MOSH | 25.8 $\pm$ 0.6                | 25.8 $\pm$ 0.5                | 25.7 $\pm$ 0.8                 | 25.5 $\pm$ 0.3                | 26.1 $\pm$ 0.3                | 26.4 $\pm$ 0.4                |
| MFH+MOSM | 26.0 $\pm$ 1.4                | 26.1 $\pm$ 1.2                | 25.9 $\pm$ 1.3                 | 26.4 $\pm$ 0.5                | 26.4 $\pm$ 0.6                | 26.4 $\pm$ 0.6                |
| MFL+MOSH | 24.7 $\pm$ 1.1 <sup>++</sup>  | 25.0 $\pm$ 1.0 <sup>++</sup>  | 25.0 $\pm$ 1.1 <sup>++</sup>   | 25.1 $\pm$ 0.4 <sup>+++</sup> | 25.5 $\pm$ 0.3 <sup>++</sup>  | 25.2 $\pm$ 0.4 <sup>+++</sup> |
| MFL+MOSM | 24.5 $\pm$ 0.9 <sup>+++</sup> | 24.6 $\pm$ 0.9 <sup>+++</sup> | 24.2 $\pm$ 1.9 <sup>#+++</sup> | 24.7 $\pm$ 0.4 <sup>+++</sup> | 24.8 $\pm$ 0.3 <sup>+++</sup> | 24.8 $\pm$ 0.5 <sup>+++</sup> |

Data were analyzed using one-way ANOVA followed by Tukey's post hoc test. <sup>\*</sup>  $p < 0.05$ , <sup>\*\*</sup>  $p < 0.01$ , <sup>\*\*\*</sup>  $p < 0.001$  compared with normal control group (NC); <sup>#</sup>  $p < 0.05$ , <sup>##</sup>  $p < 0.01$ , <sup>###</sup>  $p < 0.001$  compared with diabetic model group (MC); <sup>+</sup>  $p < 0.05$ , <sup>++</sup>  $p < 0.01$ , <sup>+++</sup>  $p < 0.001$  MF+MOS group compared with MF group with the same dosage.

**Supplemental Table 4.** Effect of treatments of MF, MOS and MF+MOS on FBG in C57BL/6J mice (mean  $\pm$  SEM)

| Group    | 0 week<br>(mmol/L)            | 1 week<br>(mmol/L)            | 2 weeks<br>(mmol/L)           | 3 weeks<br>(mmol/L)           | 4 weeks<br>(mmol/L)           | 5 weeks<br>(mmol/L)           |
|----------|-------------------------------|-------------------------------|-------------------------------|-------------------------------|-------------------------------|-------------------------------|
| NC       | 7.5 $\pm$ 0.5                 | 8.9 $\pm$ 0.9                 | 9.4 $\pm$ 0.2                 | 8.7 $\pm$ 0.4                 | 8.3 $\pm$ 0.4                 | 9.9 $\pm$ 0.2                 |
| MC       | 25.4 $\pm$ 1.6 <sup>***</sup> | 25.8 $\pm$ 2.0 <sup>***</sup> | 27.6 $\pm$ 1.6 <sup>***</sup> | 27.2 $\pm$ 1.9 <sup>***</sup> | 26.1 $\pm$ 0.7 <sup>***</sup> | 26.4 $\pm$ 1.7 <sup>***</sup> |
| MFH      | 29.6 $\pm$ 1.1                | 26.2 $\pm$ 1.2                | 27.2 $\pm$ 0.7                | 23.9 $\pm$ 2.4                | 22.0 $\pm$ 2.8                | 19.9 $\pm$ 2.8                |
| MFL      | 25.8 $\pm$ 1.0                | 27.0 $\pm$ 0.8                | 28.7 $\pm$ 0.7                | 29.8 $\pm$ 1.4                | 28.0 $\pm$ 1.7                | 26.8 $\pm$ 1.7                |
| MOSH     | 24.9 $\pm$ 1.9                | 21.1 $\pm$ 1.7                | 23.4 $\pm$ 2.9                | 23.5 $\pm$ 1.7                | 20.4 $\pm$ 2.5                | 19.2 $\pm$ 3.8                |
| MOSM     | 24.3 $\pm$ 1.0                | 23.9 $\pm$ 0.9                | 25.7 $\pm$ 1.7                | 26.6 $\pm$ 1.5                | 21.4 $\pm$ 0.9                | 23.5 $\pm$ 1.2                |
| MOSL     | 23.7 $\pm$ 1.0                | 24.6 $\pm$ 1.2                | 28.2 $\pm$ 0.4                | 29.6 $\pm$ 1.4                | 26.9 $\pm$ 0.7                | 28.6 $\pm$ 0.8                |
| MFH+MOSH | 24.6 $\pm$ 0.7                | 23.4 $\pm$ 2.0                | 23.1 $\pm$ 1.8                | 17.8 $\pm$ 2.8 <sup>#</sup>   | 15.9 $\pm$ 1.9 <sup>#</sup>   | 13.2 $\pm$ 1.8 <sup>##</sup>  |
| MFH+MOSM | 22.9 $\pm$ 2.2                | 24.1 $\pm$ 1.0                | 23.8 $\pm$ 2.3                | 24.4 $\pm$ 2.1                | 21.1 $\pm$ 2.8                | 16.0 $\pm$ 3.0 <sup>#</sup>   |
| MFL+MOSH | 21.7 $\pm$ 1.4                | 24.8 $\pm$ 1.5                | 23.7 $\pm$ 1.2                | 22.5 $\pm$ 2.0                | 18.3 $\pm$ 1.9                | 12.4 $\pm$ 2.3 <sup>###</sup> |
| MFL+MOSM | 23.7 $\pm$ 2.2                | 25.1 $\pm$ 1.6                | 24.13 $\pm$ 1.8               | 23.7 $\pm$ 1.6                | 21.5 $\pm$ 2.5                | 17.6 $\pm$ 2.5                |

Data were analyzed using one-way ANOVA followed by Tukey's post hoc test. \*  $p < 0.05$ , \*\*  $p < 0.01$ , \*\*\*  $p < 0.001$  compared with normal control group (NC); #  $p < 0.05$ , ##  $p < 0.01$ , ###  $p < 0.001$  compared with diabetic model group (MC); <sup>+</sup>  $p < 0.05$ , <sup>++</sup>  $p < 0.01$ , <sup>+++</sup>  $p < 0.001$  MF+MOS group compared with MF group with the same dosage.

**Supplemental Table 5.** Oral glucose tolerance test results in the last week of administration

| Group    | 0 min (mmol/L) | 30 min (mmol/L)         | 60 min (mmol/L)         | 120 min (mmol/L)        |
|----------|----------------|-------------------------|-------------------------|-------------------------|
| NC       | 11.1±0.9       | 14.4±1.2                | 10.3±0.4                | 8.0±0.5                 |
| MC       | 17.5±1.5       | 31.8±0.9 <sup>***</sup> | 31.0±1.1 <sup>***</sup> | 27.7±1.0 <sup>***</sup> |
| MFH      | 12.8±1.9       | 28.0±2.9                | 26.3±2.6                | 21.0±3.1                |
| MFL      | 12.7±2.9       | 26.1±3.4                | 24.6±2.8                | 20.1±3.2                |
| MOSH     | 12.6±1.5       | 26.0±1.9                | 23.6±1.6                | 19.3±2.0                |
| MOSM     | 10.8±1.1       | 28.7±1.8                | 24.0±1.7                | 21.1±2.2                |
| MOSL     | 14.9±2.2       | 30.2±1.4                | 30.0±1.1                | 26.7±0.7                |
| MFH+MOSH | 9.2±1.5        | 21.9±2.5                | 20.1±3.5 <sup>#</sup>   | 13.3±3.1 <sup>##</sup>  |
| MFH+MOSM | 10.0±1.7       | 21.5±1.1                | 21.8±2                  | 16.3±2.2 <sup>#</sup>   |
| MFL+MOSH | 12.3±0.8       | 27.1±1.1                | 25.8±1.8                | 18.9±1.2                |
| MFL+MOSM | 10.0±2.8       | 24.3±3.1                | 23.7±3.3                | 18.4±3.1                |

**Supplemental Table 6.** Effect of treatments of MF, MOS and MF+MOS on biochemical parameters in C57BL/6J mice (mean  $\pm$  SEM)

| Group    | HbA1c<br>(Absorbance/10 g hemoglobin) | HOMA-IR                         |
|----------|---------------------------------------|---------------------------------|
| NC       | 38.5 $\pm$ 1.5                        | 38.2 $\pm$ 1.5                  |
| MC       | 85.4 $\pm$ 3.9 <sup>***</sup>         | 112.3 $\pm$ 13.6 <sup>***</sup> |
| MFH      | 69.8 $\pm$ 2.8                        | 79 $\pm$ 12.1                   |
| MFL      | 85.0 $\pm$ 3.8                        | 95.9 $\pm$ 9.0                  |
| MOSH     | 69.1 $\pm$ 2.3                        | 78.5 $\pm$ 19.8                 |
| MOSM     | 75.6 $\pm$ 4.3                        | 99.2 $\pm$ 5.8                  |
| MOSL     | 86.4 $\pm$ 4.6                        | 106.3 $\pm$ 9.4                 |
| MFH+MOSH | 47.9 $\pm$ 2.6 <sup>###</sup>         | 44.7 $\pm$ 5.4 <sup>###</sup>   |
| MFH+MOSM | 64.7 $\pm$ 2.8 <sup>#</sup>           | 52.8 $\pm$ 10.9 <sup>##</sup>   |
| MFL+MOSH | 69.6 $\pm$ 4.8                        | 37.6 $\pm$ 5.7 <sup>###</sup>   |
| MFL+MOSM | 78.5 $\pm$ 4.6                        | 70.4 $\pm$ 7.8                  |
